# Supplementary material for: Gene expression signature predicts rate of type 1 diabetes progression
Source: PubMed Central journal article supplement (PMC10277927; doi:10.1016/j.ebiom.2023.104625), 2023-05-22

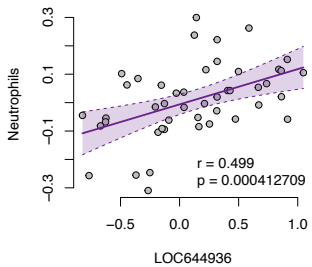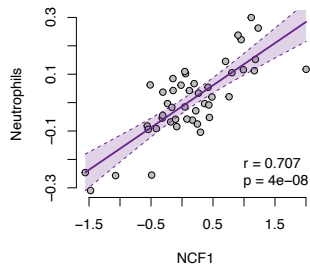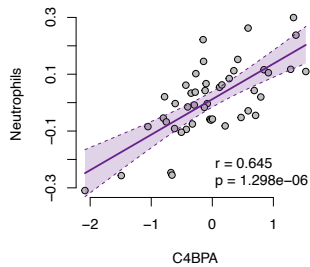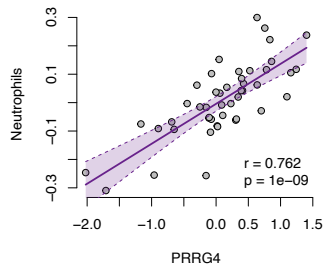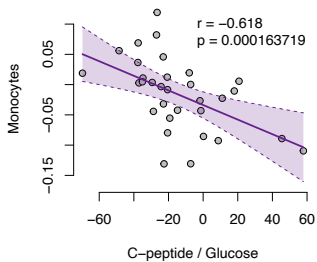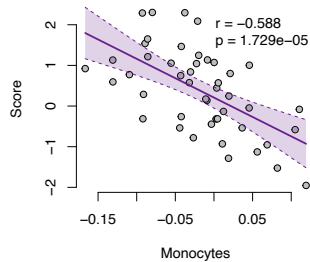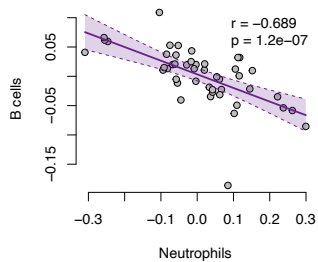

Supplement: mmc7.pdf [file mmc7.pdf]
